# Supplementary material for: Standardisation of flow cytometry for whole blood immunophenotyping of islet transplant and transplant clinical trial recipients
Source: PubMed Central journal article supplement (PMC6530858; doi:10.1371/journal.pone.0217163), 2019-05-22
Supplement: pone.0217163.s007.pdf [file pone.0217163.s007.pdf]

**S1 Table. Additional tested antibodies**

| <b>Antibody</b>                       | <b>Clone</b>                          | <b>Format</b> |
|---------------------------------------|---------------------------------------|---------------|
| CD3                                   | SK7                                   | APC-H7        |
| CD4                                   | RPA-T4                                | APC           |
| CD8                                   | RPA-T8                                | AF-700        |
| CD8                                   | RPA-T8                                | APC-H7        |
| CD11c                                 | B-ly6                                 | PE-cy7        |
| CD16                                  | 3G8                                   | APC-H7        |
| CD28                                  | CD28.2                                | BUV737        |
| CD45                                  | J.33                                  | Krome Orange  |
| CD45RO                                | UCHL1                                 | BV711         |
| CD56                                  | B159                                  | PE            |
| CD56                                  | My31                                  | PE            |
| CD62L                                 | DREG-56                               | PE            |
| CD62L                                 | DREG-57                               | BV650         |
| CD64                                  | 10.1                                  | Pacific Blue  |
| CD64                                  | 10.1                                  | APC-R700      |
| CD127                                 | HIL-7R-M21                            | BV650         |
| CD141(BDCA3)                          | AD5-14H12                             | APC           |
| CD141(BDCA3)                          | AD5-14H12                             | FITC          |
| CD197(CCR7)                           | 3D12                                  | BV711         |
| HLA-DR                                | G46-6                                 | V450          |
| ILN (CD3, CD14<br>(CD19, CD20<br>CD56 | SK7, SJ25C1,<br>NCAM16.2<br>L27, MφP9 | PE            |
