# Supplementary material for: Standardisation of flow cytometry for whole blood immunophenotyping of islet transplant and transplant clinical trial recipients
Source: PubMed Central journal article supplement (PMC6530858; doi:10.1371/journal.pone.0217163), 2019-05-22
Supplement: pone.0217163.s008.pdf [file pone.0217163.s008.pdf]

**S2 Table. Tested panels for general immune phenotype, DCs and T cell activation**

| Laser nm                                    | 355    |        | 403          |              |        | 488       | 561    |          |        | 639    |          |        |
|---------------------------------------------|--------|--------|--------------|--------------|--------|-----------|--------|----------|--------|--------|----------|--------|
| Laser mw                                    | 20     |        | 50           |              |        | 50-100    | 50     |          |        | 40     |          |        |
| Filter                                      | 379/28 | 740/28 | 440/40       | 525/50       | 710/50 | 488/10    | 586/15 | 610/20   | 780/60 | 670/14 | 730/45   | 730/45 |
| Tested Panel 2 - General immune phenotype-1 |        |        |              |              |        |           |        |          |        |        |          |        |
| CD                                          |        |        | 64           | 45           |        | 16        | 56     | 19       | 14     | 4      | 8        | 3      |
| Clone                                       |        |        | 10.1         | J.33         |        | 3G8       | B159   | HIB19    | M5E2   | RPA-T4 | RPA-T8   | SK7    |
| Format                                      |        |        | Pacific Blue | Krome Orange |        | FITC      | PE     | PE-CF594 | PE-Cy7 | APC    | AF-700   | APC-H7 |
| Tested Panel 2 - General immune phenotype-2 |        |        |              |              |        |           |        |          |        |        |          |        |
| CD                                          | 45     |        | 16           |              |        | 3         | 56     | 19       | 14     | 4      | 64       | 8      |
| Clone                                       | H130   |        | 3G8          |              |        | SK7       | B159   | HIB19    | M5E2   | RPA-T4 | 10.1     | RPA-T8 |
| Format                                      | BUV395 |        | V450         |              |        | FITC      | PE     | PE-CF594 | PE-Cy7 | APC    | APC-R700 | APC-H7 |
| Tested Panel 3 - DCs                        |        |        |              |              |        |           |        |          |        |        |          |        |
| CD                                          |        |        | HLA-DR       | 45           |        | 141       | LIN    | CD123    | CD11c  | 303    |          | CD16   |
| Clone                                       |        |        | G46-6        | J.33         |        | AD5-14H12 |        | 7G3      | B-ly6  | AC144  |          | 3G8    |
| Format                                      |        |        | V450         | Krome Orange |        | FITC      | PE     | PE-CF594 | PE-cy7 | APC    |          | APC-H7 |
| Tested Panel 5 - T cell activation          |        |        |              |              |        |           |        |          |        |        |          |        |
| CD                                          | 45     | 28     | 4            | HLA-DR       | 27     | 3         |        | 57       | 45RA   | 8      |          |        |
| Clone                                       | H130   | CD28.2 | RPA-T4       | G46-6        | L128   | SKY7      |        | NK-1     | L48    | RPA-T8 |          |        |
| Format                                      | BUV395 | BUV737 | V450         | BV510        | BV711  | FITC      |        | PE-CF594 | PE-cy7 | APC    |          |        |
