# Supplementary material for: Standardisation of flow cytometry for whole blood immunophenotyping of islet transplant and transplant clinical trial recipients
Source: PubMed Central journal article supplement (PMC6530858; doi:10.1371/journal.pone.0217163), 2019-05-22
Supplement: pone.0217163.s009.pdf [file pone.0217163.s009.pdf]

**S3 Table. Tested panels for naïve, memory and TCR $\alpha\beta$ /TCR $\gamma\delta$  T cells, and FOXP3+ Tregs**

| Laser nm                                                                            | 355    |                   | 403    |        |            |        | 488    | 561      |            |                    | 639    |        |
|-------------------------------------------------------------------------------------|--------|-------------------|--------|--------|------------|--------|--------|----------|------------|--------------------|--------|--------|
| Laser mw                                                                            | 20     |                   | 50     |        |            |        | 50-100 | 50       |            |                    | 40     |        |
| Filter                                                                              | 379/28 | 740/35            | 440/40 | 525/50 | 660/20     | 710/50 | 488/10 | 586/15   | 610/20     | 780/60             | 670/14 | 780/60 |
| Tested Panel 6 - Memory and Naïve T cells-1                                         |        |                   |        |        |            |        |        |          |            |                    |        |        |
| CD                                                                                  | 45     |                   | 4      | 3      |            | 197    | 25     | 62L      | 127        | 45RA               |        | 8      |
| Clone                                                                               | H130   |                   | RPA-T4 | UCHT1  |            | 3D12   | 2A3    | DREG-56  | HIL-7R-M21 | HI100              |        | RPA-T8 |
| Format                                                                              | BUV395 |                   | V450   | BV510  |            | BV711  | BB515  | PE       | PE-CF594   | PE-Cy7             |        | APC-H7 |
| Tested Panel 6 - Memory and Naïve T cells-2                                         |        |                   |        |        |            |        |        |          |            |                    |        |        |
| CD                                                                                  | 45     |                   | 4      | 3      | 62L        |        | 25     | 197      | 127        | 45RA               | 8      |        |
| Clone                                                                               | H130   |                   | RPA-T4 | UCHT1  | DREG-56    |        | 2A3    | 150503   | HIL-7R-M21 | HI100              | RPA-T8 |        |
| Format                                                                              | BUV395 |                   | V450   | BV510  | BV650      |        | BB515  | PE       | PE-CF594   | PE-Cy7             | APC    |        |
| Tested Panel 7 - TCR $\alpha\beta$ /TCR $\gamma\delta$ & T cell state & neutrophils |        |                   |        |        |            |        |        |          |            |                    |        |        |
| CD                                                                                  | 45     | TCR $\alpha\beta$ | 4      | 3      |            | 45RO   | 16     | 88       | 183        | TCR $\gamma\delta$ | 8      |        |
| Clone                                                                               | H130   | T10B9.1A-31       | RPA-T4 | UCHT1  |            | UCHL1  | NKP15  | C85-4124 | 1C6        | 11F2               | RPA-T8 |        |
| Format                                                                              | BUV395 | BUV737            | V450   | BV510  |            | BV711  | FITC   | PE       | PE-CF594   | PE-Cy7             | APC    |        |
| Tested Panel 8 – FOXP3 Tregs -1                                                     |        |                   |        |        |            |        |        |          |            |                    |        |        |
| CD                                                                                  | 45     | 39                | 137    | 3      | 127        | 45RO   | 25     |          | FOXP3      | 4                  | 154    |        |
| Clone                                                                               | H130   | TU66              | 4B4-1  | UCHT1  | HIL-7R-M21 | UCHL1  | 2A3    |          | 259D/C7    | RPA-T4             | TRAP-1 |        |
| Format                                                                              | BUV395 | BUV737            | V450   | BV510  | BV650      | BV711  | BB515  |          | PE-CF594   | PE-Cy7             | APC    |        |
