# Supplementary material for: Standardisation of flow cytometry for whole blood immunophenotyping of islet transplant and transplant clinical trial recipients
Source: PubMed Central journal article supplement (PMC6530858; doi:10.1371/journal.pone.0217163), 2019-05-22
Supplement: pone.0217163.s010.pdf [file pone.0217163.s010.pdf]

**S4 Table. Spillover spreading matrix of the Panel 2**

| <b>Panel 2</b>                | <b>FITC<br/>CD3</b> | <b>APC<br/>CD8</b> | <b>APC-<br/>R700<br/>CD64</b> | <b>BUV395<br/>CD45</b> | <b>V450<br/>CD16</b> | <b>V500<br/>CD4</b> | <b>PE<br/>CD56</b> | <b>PE-<br/>CF594<br/>CD19</b> | <b>PE-<br/>Cy7<br/>CD14</b> | <b>Sum</b> |
|-------------------------------|---------------------|--------------------|-------------------------------|------------------------|----------------------|---------------------|--------------------|-------------------------------|-----------------------------|------------|
| <b>FITC<br/>CD3</b>           | 0                   | 0.0451             | 0                             | 0.0611                 | 0                    | 0.884               | 0                  | 0                             | 0.0304                      | 1.0206     |
| <b>APC<br/>CD8</b>            | 0.0237              | 0                  | 0.761                         | 0                      | 0                    | 0.0638              | 0.0512             | 0.126                         | 1.07                        | 2.0957     |
| <b>APC-<br/>R700<br/>CD64</b> | 0.0525              | 1.2                | 0                             | 0                      | 0                    | 0                   | 0.0556             | 0.0662                        | 3.01                        | 4.3843     |
| <b>BUV395<br/>CD45</b>        | 0                   | 0.0519             | 0                             | 0                      | 0.0987               | 0                   | 0                  | 0                             | 0                           | 0.1506     |
| <b>V450<br/>CD16</b>          | 0.0216              | 0.027              | 0.0189                        | 0                      | 0                    | 0.697               | 0.0369             | 0.0018                        | 0.0262                      | 0.8294     |
| <b>V500<br/>CD4</b>           | 0.15                | 0                  | 0.0179                        | 0                      | 0.212                | 0                   | 0                  | 0                             | 0                           | 0.3799     |
| <b>PE<br/>CD56</b>            | 0.0797              | 0.0173             | 0.0075                        | 0.0257                 | 0                    | 0.0782              | 0                  | 1.24                          | 0.287                       | 1.7354     |
| <b>PE-<br/>CF594<br/>CD19</b> | 0.031               | 0.103              | 0.0312                        | 0                      | 0.0255               | 0.013               | 1.21               | 0                             | 0.838                       | 2.2517     |
| <b>PE-Cy7<br/>CD14</b>        | 0.0307              | 0.0366             | 0.0758                        | 0                      | 0                    | 0                   | 0.299              | 0.166                         | 0                           | 0.6081     |
| <b>Sum</b>                    | 0.3892              | 1.4809             | 0.9123                        | 0.0868                 | 0.3362               | 1.736               | 1.6527             | 1.6                           | 5.2616                      |            |
