# Supplementary material for: Standardisation of flow cytometry for whole blood immunophenotyping of islet transplant and transplant clinical trial recipients
Source: PubMed Central journal article supplement (PMC6530858; doi:10.1371/journal.pone.0217163), 2019-05-22
Supplement: pone.0217163.s011.pdf [file pone.0217163.s011.pdf]

**S5 Table. Spillover spreading matrix of the Panel 3**

| <b>Panel3</b>         | <b>FITC LIN</b> | <b>APC CD303</b> | <b>BUV395 CD45</b> | <b>V450 CD16</b> | <b>BV510 HLA-DR</b> | <b>BV711 CD141</b> | <b>PE CD11c</b> | <b>PE-CF594 CD123</b> | <b>Sum</b> |
|-----------------------|-----------------|------------------|--------------------|------------------|---------------------|--------------------|-----------------|-----------------------|------------|
| <b>FITC LIN</b>       | 0               | 0.0747           | 0.108              | 0                | 0.805               | 0                  | 0               | 0                     | 0.9877     |
| <b>APC CD303</b>      | 0.035           | 0                | 0.0468             | 0                | 0.0358              | 0.965              | 0.0386          | 0.168                 | 1.2892     |
| <b>BUV395 CD45</b>    | 0.043           | 0.0295           | 0                  | 0.277            | 0.107               | 0.0213             | 0.037           | 0                     | 0.5148     |
| <b>V450 CD16</b>      | 0.036           | 0.0022           | 0                  | 0                | 0.697               | 0.0794             | 0               | 0                     | 0.8146     |
| <b>BV510 HLA-DR</b>   | 0.1             | 0.0335           | 0                  | 0.371            | 0                   | 0.687              | 0.0318          | 0.0367                | 1.26       |
| <b>BV711 CD141</b>    | 0               | 0.231            | 0.0581             | 0.592            | 0.177               | 0                  | 0.0337          | 0.0493                | 1.1411     |
| <b>PE CD11c</b>       | 0.07            | 0.015            | 0                  | 0.0209           | 0.0613              | 0.233              | 0               | 1.4                   | 1.8002     |
| <b>PE-CF594 CD123</b> | 0.028           | 0.082            | 0                  | 0.0472           | 0                   | 0.819              | 1.34            | 0                     | 2.3162     |
| <b>Sum</b>            | 0.314           | 0.469            | 0.2129             | 1.3081           | 1.8831              | 2.8047             | 1.4811          | 1.654                 |            |
