# Supplementary material for: Standardisation of flow cytometry for whole blood immunophenotyping of islet transplant and transplant clinical trial recipients
Source: PubMed Central journal article supplement (PMC6530858; doi:10.1371/journal.pone.0217163), 2019-05-22
Supplement: pone.0217163.s012.pdf [file pone.0217163.s012.pdf]

**S6 Table. Spillover spreading matrix of the Panel 4**

| <b>Panel 4</b>                | <b>BB515<br/>CD19</b> | <b>APC<br/>IgM</b> | <b>BUV395<br/>CD45</b> | <b>V421<br/>CD38</b> | <b>BV510<br/>IgD</b> | <b>PE<br/>CD21</b> | <b>PE-<br/>CF594<br/>CD27</b> | <b>PE-<br/>Cy7<br/>CD24</b> | <b>Sum</b> |
|-------------------------------|-----------------------|--------------------|------------------------|----------------------|----------------------|--------------------|-------------------------------|-----------------------------|------------|
| <b>BB515<br/>CD19</b>         | 0                     | 0.041              | 0                      | 0.0201               | 0.428                | 0                  | 0                             | 0                           | 0.4891     |
| <b>APC<br/>IgM</b>            | 0                     | 0                  | 0                      | 0.154                | 0.468                | 0.091              | 0.128                         | 0.908                       | 1.749      |
| <b>BUV395<br/>CD45</b>        | 0                     | 0.056              | 0                      | 0.0751               | 0                    | 0                  | 0                             | 0.0307                      | 0.1618     |
| <b>V421<br/>CD38</b>          | 0.0487                | 0                  | 0                      | 0                    | 0.711                | 0.0308             | 0.0141                        | 0.0276                      | 0.8322     |
| <b>BV510<br/>IgD</b>          | 0.107                 | 0.0317             | 0                      | 0.1                  | 0                    | 0                  | 0.0272                        | 0                           | 0.2659     |
| <b>PE<br/>CD21</b>            | 0.0645                | 0.0228             | 0.0402                 | 0                    | 0.0672               | 0                  | 1.21                          | 0.25                        | 1.6547     |
| <b>PE-<br/>CF594<br/>CD27</b> | 0.031                 | 0.109              | 0                      | 0                    | 0                    | 1.19               | 0                             | 0.785                       | 2.115      |
| <b>PE-Cy7<br/>CD24</b>        | 0.0264                | 0.0434             | 0                      | 0.0193               | 0                    | 0.355              | 0.197                         | 0                           | 0.6411     |
| <b>Sum</b>                    | 0.2776                | 0.3039             | 0.0402                 | 0.3685               | 1.6742               | 1.6668             | 1.5763                        | 2.0013                      |            |
