# Supplementary material for: Standardisation of flow cytometry for whole blood immunophenotyping of islet transplant and transplant clinical trial recipients
Source: PubMed Central journal article supplement (PMC6530858; doi:10.1371/journal.pone.0217163), 2019-05-22
Supplement: pone.0217163.s013.pdf [file pone.0217163.s013.pdf]

**S7 Table. Spillover spreading matrix of the Panel 5**

| <b>Panel 5</b>                | <b>BB515<br/>CD8</b> | <b>APC<br/>CD28</b> | <b>BUV3<br/>95<br/>CD45</b> | <b>BUV7<br/>40<br/>CD3</b> | <b>V450<br/>CD4</b> | <b>BV510<br/>HLA-<br/>DR</b> | <b>BV711<br/>CD27</b> | <b>PE-<br/>CF594<br/>CD57</b> | <b>PE-<br/>Cy7<br/>CDRA</b> | <b>Sum</b> |
|-------------------------------|----------------------|---------------------|-----------------------------|----------------------------|---------------------|------------------------------|-----------------------|-------------------------------|-----------------------------|------------|
| <b>BB515<br/>CD8</b>          | 0                    | 0                   | 0                           | 0                          | 0                   | 0.461                        | 0                     | 0                             | 0                           | 0.461      |
| <b>APC<br/>CD28</b>           | 0.0893               | 0                   | 0.0776                      | 0.955                      | 0                   | 0.0952                       | 1.05                  | 0.121                         | 0.834                       | 3.2221     |
| <b>BUV395<br/>CD45</b>        | 0                    | 0.0705              | 0                           | 0.2                        | 0.193               | 0.144                        | 0                     | 0.103                         | 0.0794                      | 0.7899     |
| <b>BUV740<br/>CD3</b>         | 0.0617               | 0.135               | 0.258                       | 0                          | 0                   | 0                            | 1.2                   | 0.0617                        | 0.579                       | 2.2954     |
| <b>V450<br/>CD4</b>           | 0.0286               | 0                   | 0                           | 0                          | 0                   | 0.42                         | 0.0689                | 0.0286                        | 0.0286                      | 0.5747     |
| <b>BV510<br/>HLA-DR</b>       | 0.103                | 0                   | 0                           | 0.505                      | 0.314               | 0                            | 0.701                 | 0                             | 0.0558                      | 1.6788     |
| <b>BV711<br/>CD27</b>         | 0                    | 0.239               | 0                           | 2.95                       | 0.446               | 0.12                         | 0                     | 0                             | 0.345                       | 4.1        |
| <b>PE-<br/>CF594<br/>CD57</b> | 0.0333               | 0.104               | 0                           | 0.407                      | 0                   | 0                            | 0.839                 | 0                             | 0.826                       | 2.2093     |
| <b>PE-Cy7<br/>CDRA</b>        | 0.0398               | 0.0398              | 0                           | 0.432                      | 0                   | 0                            | 0.0925                | 0.181                         | 0                           | 0.7851     |
| <b>Sum</b>                    | 0.3557               | 0.5883              | 0.3356                      | 5.449                      | 0.953               | 1.2402                       | 3.9514                | 0.4953                        | 2.7478                      |            |
