# Supplementary material for: Standardisation of flow cytometry for whole blood immunophenotyping of islet transplant and transplant clinical trial recipients
Source: PubMed Central journal article supplement (PMC6530858; doi:10.1371/journal.pone.0217163), 2019-05-22
Supplement: pone.0217163.s014.pdf [file pone.0217163.s014.pdf]

**S8 Table. Spillover spreading matrix of the Panel 6**

| <b>Panel 6</b>                 | <b>BB515<br/>CD25</b> | <b>APC<br/>CD8</b> | <b>BUV395<br/>CD45</b> | <b>V450<br/>CD4</b> | <b>BV510<br/>CD3</b> | <b>BV711<br/>CD62L</b> | <b>PE<br/>CCR7</b> | <b>PE-<br/>CF594<br/>CD127</b> | <b>PE-<br/>Cy7<br/>CDRA</b> | <b>Sum</b> |
|--------------------------------|-----------------------|--------------------|------------------------|---------------------|----------------------|------------------------|--------------------|--------------------------------|-----------------------------|------------|
| <b>BB515<br/>CD25</b>          | 0                     | 0.0181             | 0                      | 0.0456              | 0.414                | 0.0256                 | 0                  | 0                              | 0                           | 0.5033     |
| <b>APC<br/>CD8</b>             | 0.0055                | 0                  | 0.0408                 | 0.0814              | 0                    | 1.05                   | 0.0429             | 0.131                          | 0.838                       | 2.1896     |
| <b>BUV395<br/>CD45</b>         | 0                     | 0                  | 0                      | 0.182               | 0                    | 0                      | 0                  | 0                              | 0                           | 0.182      |
| <b>V450<br/>CD4</b>            | 0.0224                | 0                  | 0.0422                 | 0                   | 0.704                | 0.1                    | 0                  | 0                              | 0                           | 0.8686     |
| <b>BV510<br/>CD3</b>           | 0.088                 | 0.0268             | 0                      | 0.362               | 0                    | 0.706                  | 0                  | 0.03                           | 0.0158                      | 1.2286     |
| <b>BV711<br/>CD62L</b>         | 0.0274                | 0.182              | 0.0531                 | 0.437               | 0.0725               | 0                      | 0                  | 0                              | 0.342                       | 1.114      |
| <b>PE<br/>CCR7</b>             | 0.0702                | 0.0253             | 0                      | 0                   | 0.0601               | 0.263                  | 0                  | 1.21                           | 0.298                       | 1.9266     |
| <b>PE-<br/>CF594<br/>CD127</b> | 0.0332                | 0.0877             | 0                      | 0.0487              | 0                    | 0.82                   | 1.2                | 0                              | 0.884                       | 3.0736     |
| <b>PE-Cy7<br/>CDRA</b>         | 0.0156                | 0.0322             | 0                      | 0                   | 0                    | 0.0826                 | 0.289              | 0.158                          | 0                           | 0.5774     |
| <b>Sum</b>                     | 0.2623                | 0.3721             | 0.1361                 | 1.1567              | 1.2506               | 3.0472                 | 1.5319             | 1.529                          | 2.3778                      |            |
