# Supplementary material for: Standardisation of flow cytometry for whole blood immunophenotyping of islet transplant and transplant clinical trial recipients
Source: PubMed Central journal article supplement (PMC6530858; doi:10.1371/journal.pone.0217163), 2019-05-22
Supplement: pone.0217163.s015.pdf [file pone.0217163.s015.pdf]

**S9 Table. Spillover spreading matrix of the Panel 7**

| <b>Panel 7</b>                                | <b>FITC<br/>CD16</b> | <b>APC<br/>CD8</b> | <b>BUV3<br/>95<br/>CD45</b> | <b>BUV7<br/>37<br/>TCR<math>\alpha</math><br/><math>\beta</math></b> | <b>V450<br/>CD4</b> | <b>BV510<br/>CD3</b> | <b>BV786<br/>CD45R<br/>O</b> | <b>PE<br/>C5aR</b> | <b>PE-<br/>CF594<br/>CD19<br/>3</b> | <b>PE-Cy<br/>TCR<math>\gamma</math><br/><math>\delta</math></b> | <b>Sum</b> |
|-----------------------------------------------|----------------------|--------------------|-----------------------------|----------------------------------------------------------------------|---------------------|----------------------|------------------------------|--------------------|-------------------------------------|-----------------------------------------------------------------|------------|
| <b>FITC<br/>CD16</b>                          | 0                    | 0.0488             | 0                           | 0.0969                                                               | 0                   | 0.896                | 0.104                        | 0                  | 0                                   | 0                                                               | 1.1457     |
| <b>APC<br/>CD8</b>                            | 0.0312               | 0                  | 0.0592                      | 0.973                                                                | 0.0738              | 0                    | 0.386                        | 0.0933             | 0.122                               | 0.845                                                           | 2.5835     |
| <b>BUV395<br/>CD45</b>                        | 0.0711               | 0                  | 0                           | 0.232                                                                | 0.198               | 0                    | 0.106                        | 0.0864             | 0                                   | 0                                                               | 0.6935     |
| <b>BUV737<br/>TCR<math>\alpha\beta</math></b> | 0.0232               | 0.146              | 0.26                        | 0                                                                    | 0.113               | 0                    | 1.2                          | 0.0854             | 0.0544                              | 0.606                                                           | 2.488      |
| <b>V450<br/>CD4</b>                           | 0                    | 0.0511             | 0                           | 0.0064                                                               | 0                   | 0.668                | 0                            | 0                  | 0                                   | 0                                                               | 0.7255     |
| <b>BV510<br/>CD3</b>                          | 0.0826               | 0.0022             | 0                           | 0.488                                                                | 0.331               | 0                    | 0.375                        | 0                  | 0.0157                              | 0                                                               | 1.2945     |
| <b>BV786<br/>CD45R<br/>O</b>                  | 0                    | 0.097              | 0                           | 1.12                                                                 | 0.982               | 0.224                | 0                            | 0.0306             | 0.0035                              | 0.365                                                           | 2.8221     |
| <b>PE<br/>C5aR</b>                            | 0.063                | 0.0019             | 0                           | 0.164                                                                | 0                   | 0.0654               | 0.0977                       | 0                  | 1.25                                | 0.306                                                           | 1.948      |
| <b>PE-<br/>CF594<br/>CD193</b>                | 0.0305               | 0.1                | 0                           | 0.402                                                                | 0.0346              | 0.0303               | 0.279                        | 1.24               | 0                                   | 0.782                                                           | 2.8984     |
| <b>PE-Cy<br/>TCR<math>\gamma\delta</math></b> | 0.036                | 0.0356             | 0                           | 0.442                                                                | 0.155               | 0                    | 1.59                         | 0.385              | 0.212                               | 0                                                               | 2.8556     |
| <b>Sum</b>                                    | 0.3376               | 0.4826             | 0.3192                      | 3.9243                                                               | 1.8874              | 1.8837               | 4.1377                       | 1.9207             | 1.6576                              | 2.904                                                           |            |
