# Supplementary material for: Standardisation of flow cytometry for whole blood immunophenotyping of islet transplant and transplant clinical trial recipients
Source: PubMed Central journal article supplement (PMC6530858; doi:10.1371/journal.pone.0217163), 2019-05-22
Supplement: pone.0217163.s016.pdf [file pone.0217163.s016.pdf]

**S10 Table. Spillover spreading matrix of the Panel 8**

| <b>Panel 8</b>                 | <b>BB51<br/>5<br/>CD25</b> | <b>APC<br/>CD15<br/>4</b> | <b>BUV3<br/>95<br/>CD45</b> | <b>BUV7<br/>37<br/>CD39</b> | <b>V421<br/>CD13<br/>7</b> | <b>BV510<br/>CD3</b> | <b>BV786<br/>CD45R<br/>O</b> | <b>PE<br/>CD12<br/>7</b> | <b>PE-<br/>CF594<br/>FOXP<br/>3</b> | <b>PE-<br/>Cy7<br/>CD4</b> | <b>Sum</b> |
|--------------------------------|----------------------------|---------------------------|-----------------------------|-----------------------------|----------------------------|----------------------|------------------------------|--------------------------|-------------------------------------|----------------------------|------------|
| <b>BB515<br/>CD25</b>          | 0                          | 0                         | 0                           | 0                           | 0                          | 0.461                | 0                            | 0                        | 0                                   | 0                          | 0.461      |
| <b>APC<br/>CD154</b>           | 0.0893                     | 0                         | 0.0776                      | 0.907                       | 0                          | 0.0952               | 0.442                        | 0                        | 0.121                               | 0.854                      | 2.5861     |
| <b>BUV395<br/>CD45</b>         | 0                          | 0.0699                    | 0                           | 0.204                       | 0.0975                     | 0                    | 0                            | 0                        | 0                                   | 0.0786                     | 0.45       |
| <b>BUV737<br/>CD39</b>         | 0.0617                     | 0.135                     | 0.258                       | 0                           | 0.0874                     | 0                    | 1.24                         | 0.0764                   | 0.0616                              | 0.595                      | 2.5151     |
| <b>V421<br/>CD137</b>          | 0.0286                     | 0                         | 0                           | 0                           | 0                          | 0.42                 | 0.0338                       | 0                        | 0                                   | 0.0286                     | 0.511      |
| <b>BV510<br/>CD3</b>           | 0.103                      | 0                         | 0                           | 0.5                         | 0.314                      | 0                    | 0.377                        | 0                        | 0                                   | 0                          | 1.294      |
| <b>BV786<br/>CD45R<br/>O</b>   | 0.0005                     | 0.11                      | 0                           | 1.18                        | 0.935                      | 0.237                | 0                            | 0.0741                   | 0.0637                              | 0.371                      | 2.9713     |
| <b>PE<br/>CD127</b>            | 0.0733                     | 0.0335                    | 0                           | 0.143                       | 0                          | 0.0701               | 0.108                        | 0                        | 1.34                                | 0.288                      | 2.0559     |
| <b>PE-<br/>CF594<br/>FOXP3</b> | 0.0333                     | 0.104                     | 0                           | 0.38                        | 0                          | 0                    | 0.289                        | 1.31                     | 0                                   | 0.825                      | 2.9413     |
| <b>PE-Cy7<br/>CD4</b>          | 0.0398                     | 0.0398                    | 0                           | 0.432                       | 0.145                      | 0                    | 1.55                         | 0.382                    | 0.199                               | 0                          | 2.7876     |
| <b>Sum</b>                     | 0.4295                     | 0.4922                    | 0.3356                      | 3.746                       | 1.5789                     | 1.2833               | 4.0398                       | 1.8425                   | 1.7853                              | 3.0402                     |            |
