# Supplementary material for: Standardisation of flow cytometry for whole blood immunophenotyping of islet transplant and transplant clinical trial recipients
Source: PubMed Central journal article supplement (PMC6530858; doi:10.1371/journal.pone.0217163), 2019-05-22
Supplement: pone.0217163.s017.pdf [file pone.0217163.s017.pdf]

S11 Table. Comparisons across panels

| Type of CD45+*                  | Panel | Format/Clone        | Population frequency %† (Control) |            |            |            |            | Population frequency % (Patient Pre) |            |            |            |            |
|---------------------------------|-------|---------------------|-----------------------------------|------------|------------|------------|------------|--------------------------------------|------------|------------|------------|------------|
|                                 |       |                     | C#1                               | C2         | C3         | C4         | C5         | P**1                                 | P2         | P3         | P4         | P5         |
| CD3+                            | 2     | FITC/SK7            | 60                                | 59         | 40         | 64         | 55         | 43                                   | 55         | 57         | 55         | 65         |
|                                 | 5     | BUV737/UCHT1        | 60                                | 59         | 39         | 63         | 54         | 44                                   | 56         | 57         | 54         | 64         |
|                                 | 6     | BV510/UCHT1         | 60                                | 59         | 39         | 63         | 55         | 43                                   | 56         | 58         | 55         | 64         |
|                                 | 7     | BV510/UCHT1         | 59                                | 58         | 40         | 62         | 54         | 44                                   | 56         | 58         | 55         | 64         |
|                                 | 8     | BV510/UCHT1         | 58                                | 59         | 37         | 62         | 52         | 42                                   | 55         | 56         | 52         | 64         |
| <b>Coefficient of variation</b> |       |                     | <b>1.2</b>                        | <b>0.5</b> | <b>2.9</b> | <b>0.9</b> | <b>1.8</b> | <b>1.7</b>                           | <b>1</b>   | <b>2</b>   | <b>2.1</b> | <b>0.5</b> |
| CD4+                            | 2     | V500/RPA-T4         | 27                                | 39         | 21         | 46         | 35         | 23                                   | 30         | 38         | 27         | 46         |
|                                 | 5     | V450/ RPA-T4        | 27                                | 39         | 21         | 46         | 34         | 23                                   | 30         | 38         | 26         | 45         |
|                                 | 6     | V450/ RPA-T4        | 27                                | 39         | 21         | 46         | 34         | 23                                   | 30         | 39         | 25         | 46         |
|                                 | 7     | V450/ RPA-T4        | 27                                | 39         | 21         | 45         | 34         | 23                                   | 30         | 39         | 26         | 45         |
|                                 | 8     | PE-Cy7/ RPA-T4      | 27                                | 39         | 19         | 45         | 33         | 22                                   | 30         | 37         | 25         | 45         |
| <b>Coefficient of variation</b> |       |                     | <b>1.5</b>                        | <b>0.3</b> | <b>3.5</b> | <b>1.3</b> | <b>1.9</b> | <b>2.6</b>                           | <b>0.7</b> | <b>1.7</b> | <b>2.9</b> | <b>1</b>   |
| CD16+                           | 2     | V450/3G8            | 13                                | 11         | 24         | 14         | 22         | 16                                   | 6.9        | 8.9        | 21         | 6.9        |
|                                 | 3     | V450/3G8            | 12                                | 11         | 24         | 15         | 22         | 17                                   | 7.3        | 9.2        | 21         | 7          |
|                                 | 7     | FITC/ NKP15         | 13                                | 11         | 25         | 14         | 21         | 16                                   | 7.1        | 8.9        | 20         | 6.7        |
| <b>Coefficient of variation</b> |       |                     | <b>1.2</b>                        | <b>0.5</b> | <b>1.7</b> | <b>1.7</b> | <b>2.2</b> | <b>0.9</b>                           | <b>2.8</b> | <b>2.1</b> | <b>2.2</b> | <b>2.2</b> |
| CD27+                           | 4     | PE-CF594/ M-T271    | 51                                | 53         | 31         | 62         | 43         | 47                                   | 56         | 55         | 40         | 65         |
|                                 | 7     | BV711/ L128         | 52                                | 53         | 30         | 60         | 42         | 50                                   | 56         | 54         | 39         | 63         |
| <b>Coefficient of variation</b> |       |                     | <b>1.8</b>                        | <b>0.7</b> | <b>3</b>   | <b>1.9</b> | <b>2.2</b> | <b>3.9</b>                           | <b>1</b>   | <b>1.2</b> | <b>0.7</b> | <b>2.1</b> |
| CD127+                          | 6     | PE-CF594/HIL.7R.M21 | 52                                | 53         | 30         | 59         | 41         | 37                                   | 54         | 49         | 44         | 55         |
|                                 | 8     | PE/ HIL.7R.M21      | 50                                | 53         | 28         | 60         | 42         | 35                                   | 52         | 47         | 45         | 55         |
| <b>Coefficient of variation</b> |       |                     | <b>2.1</b>                        | <b>0.5</b> | <b>4.4</b> | <b>1.8</b> | <b>1.9</b> | <b>2.5</b>                           | <b>2.4</b> | <b>2.8</b> | <b>1.2</b> | <b>0.2</b> |
