# Supplementary material for: Standardisation of flow cytometry for whole blood immunophenotyping of islet transplant and transplant clinical trial recipients
Source: PubMed Central journal article supplement (PMC6530858; doi:10.1371/journal.pone.0217163), 2019-05-22
Supplement: pone.0217163.s018.pdf [file pone.0217163.s018.pdf]

**S12 Table. Test of technical repeatability**

| Control | Cell Type    | 1    | 2    | 3    | 4    | 5    | CV  |
|---------|--------------|------|------|------|------|------|-----|
| C2      | Granulocytes | 6660 | 6826 | 7169 | 6840 | 6669 | 3.0 |
|         | Monocytes    | 408  | 407  | 422  | 401  | 416  | 2.0 |
|         | B cells      | 215  | 227  | 230  | 229  | 211  | 3.9 |
|         | T cells      | 1099 | 1124 | 1175 | 1122 | 1102 | 2.7 |
|         | NK cells     | 141  | 138  | 141  | 144  | 133  | 2.9 |
|         | NKT cells    | 41.8 | 39.1 | 43   | 42.1 | 38.4 | 4.9 |
| C4      | Granulocytes | 1831 | 1880 | 1809 | 1904 | 1853 | 2.0 |
|         | Monocytes    | 261  | 286  | 273  | 288  | 261  | 4.7 |
|         | B cells      | 98   | 106  | 98   | 100  | 105  | 3.9 |
|         | T cells      | 1568 | 1620 | 1547 | 1626 | 1595 | 2.1 |
|         | NK cells     | 157  | 150  | 149  | 161  | 160  | 3.6 |
|         | NKT cells    | 57   | 58   | 52   | 56   | 56   | 4.2 |
| C5      | Granulocytes | 2595 | 2518 | 2704 | 2688 | 2825 | 4.3 |
|         | Monocytes    | 389  | 386  | 376  | 390  | 416  | 3.7 |
|         | B cells      | 151  | 153  | 151  | 146  | 154  | 2.0 |
|         | T cells      | 1066 | 1043 | 1026 | 1032 | 1068 | 1.8 |
|         | NK cells     | 398  | 398  | 407  | 405  | 415  | 1.7 |
|         | NKT cells    | 134  | 127  | 134  | 133  | 136  | 2.5 |
