# Supplementary material for: Standardisation of flow cytometry for whole blood immunophenotyping of islet transplant and transplant clinical trial recipients
Source: PubMed Central journal article supplement (PMC6530858; doi:10.1371/journal.pone.0217163), 2019-05-22
Supplement: pone.0217163.s019.pdf [file pone.0217163.s019.pdf]

**S13 Table. Frequency of selected T subsets over time and their CVs**

| Control*             | Subsets/Cell Type (%) | Panel        | 1 <sup>st</sup> | 2 <sup>nd</sup> | 3 <sup>rd</sup> | CV† |
|----------------------|-----------------------|--------------|-----------------|-----------------|-----------------|-----|
| C2                   | CD4+/ CD3+ T          | 2            | 65.9            | 69.3            | 65.6            | 3.0 |
|                      |                       | 5            | 66.3            | 69.5            | 65.3            | 3.2 |
|                      |                       | 7            | 66.1            | 69.5            | 65.2            | 3.3 |
|                      | CD8+/ CD3+ T          | 2            | 28.1            | 25.7            | 28.2            | 5.1 |
|                      |                       | 5            | 27.7            | 25.2            | 27.5            | 5.1 |
|                      |                       | 7            | 27.6            | 25.4            | 28.5            | 5.8 |
|                      | CD25+CD127- / CD4+ T  | 6            | 5.67            | 5.82            | 5.89            | 1.9 |
|                      |                       | 8            | 5.75            | 5.63            | 5.62            | 1.3 |
|                      | C4                    | CD4+/ CD3+ T | 2               | 72.2            | 73.1            |     |
| 5                    |                       |              | 71.8            | 72.6            |                 | 0.8 |
| 7                    |                       |              | 71.8            | 72.0            |                 | 0.2 |
| CD8+/ CD3+ T         |                       | 2            | 24.7            | 23.8            |                 | 2.3 |
|                      |                       | 5            | 24.7            | 25.3            |                 | 1.7 |
|                      |                       | 7            | 24.7            | 24.2            |                 | 1.4 |
| CD25+CD127- / CD4+ T |                       | 6            | 6.50            | 6.85            |                 | 3.7 |
|                      |                       | 8            | 7.03            | 7.11            |                 | 0.9 |
| C6                   |                       | CD4+/ CD3+ T | 2               | 51.9            | 55.2            |     |
|                      | 5                     |              | 50.9            | 54.2            |                 | 4.4 |
|                      | 7                     |              | 53.6            | 55.0            |                 | 1.8 |
|                      | CD8+/ CD3+ T          | 2            | 36.9            | 35.5            |                 | 2.9 |
|                      |                       | 5            | 37.0            | 35.1            |                 | 3.7 |
|                      |                       | 7            | 35.2            | 34.2            |                 | 2.0 |
|                      | CD25+CD127- / CD4+ T  | 6            | 7.45            | 7.90            |                 | 4.1 |
|                      |                       | 8            | 7.80            | 8.23            |                 | 3.7 |
