# Supplementary material for: Standardisation of flow cytometry for whole blood immunophenotyping of islet transplant and transplant clinical trial recipients
Source: PubMed Central journal article supplement (PMC6530858; doi:10.1371/journal.pone.0217163), 2019-05-22
Supplement: pone.0217163.s020.pdf [file pone.0217163.s020.pdf]

**S14 Table. Frequency of low-numbered cell populations over time and their CVs**

| Control* | Subsets/ Cell Type (Percentage)  | Panel | 1 <sup>st</sup> | 2 <sup>nd</sup> | 3 <sup>rd</sup> | CV†  |
|----------|----------------------------------|-------|-----------------|-----------------|-----------------|------|
| C2       | HLA-DR+CD45RA-/ CD3+CD4+ T       | 5     | 3.92            | 3.50            | 3.95            | 6.6  |
|          | TCR $\gamma\delta$ / CD45+CD3+ T | 7     | 5.21            | 4.10            | 5.40            | 14.3 |
|          | CD127+CD45RO+ / FOXP3 Tregs      | 8     | 8.10            | 9.10            | 7.21            | 11.6 |
|          | CD56+brightCD16-/ NK cells       | 2     | 4.71            | 6.29            | 5.53            | 14.3 |
|          | CD56+CD16- / CD14+ monocytes     | 2     | 9.74            | 9.87            | 9.99            | 1.3  |
|          | mDC2/ CD11c+HLA-R+DCs            | 3     | 5.12            | 5.32            | 5.08            | 2.5  |
|          | CD27+IgD- memory/ CD45+CD19+ B   | 4     | 11.4            | 9.31            | 10.4            | 10.1 |
| C4       | HLA-DR+CD45RA-/ CD4+ T           | 5     | 5.80            | 6.13            |                 | 3.9  |
|          | TCR $\gamma\delta$ / CD45+CD3+ T | 7     | 1.10            | 0.90            |                 | 14.1 |
|          | CD127+CD45RO+ / FOXP3 Tregs      | 8     | 15.9            | 15.6            |                 | 1.3  |
|          | CD56+brightCD16-/ NK cells       | 2     | 2.94            | 3.36            |                 | 9.4  |
|          | CD56+CD16- / CD14+ monocytes     | 2     | 13.3            | 12.3            |                 | 5.5  |
|          | mDC2/ CD11c+HLA-R+DCs            | 3     | 4.52            | 4.18            |                 | 5.5  |
|          | CD27+IgD- memory/ CD45+CD19+ B   | 4     | 21.6            | 18.4            |                 | 11.3 |
| C6       | HLA-DR+CD45RA-/ CD4+ T           | 5     | 6.50            | 7.04            |                 | 5.6  |
|          | TCR $\gamma\delta$ / CD45+CD3+ T | 7     | 6.26            | 6.77            |                 | 5.5  |
|          | CD127+CD45RO+ / FOXP3 Tregs      | 8     | 5.20            | 4.40            |                 | 11.7 |
|          | CD56+brightCD16-/ NK cells       | 2     | 2.70            | 3.24            |                 | 12.8 |
|          | CD56+CD16- / CD14+ monocytes     | 2     | 32.1            | 30.0            |                 | 4.8  |
|          | mDC2/ CD11c+HLA-R+DCs            | 3     | 2.29            | 2.08            |                 | 6.8  |
|          | CD27+IgD- memory/ CD45+CD19+ B   | 4     | 13.5            | 11.5            |                 | 11.3 |
